# Supplementary material for: Evaluating the Quality of Cheese Slices Packaged with Na-Alginate Edible Films Supplemented with Functional Lactic Acid Bacteria Cultures after High-Pressure Processing
Source: MDPI journal article supplement (doi:10.3390/foods11182855), 2022-09-15
Supplement: s1 [file s1]

# Supplementary Tables and Figures

Supplementary Table S1: Different parts of RP-HPLC profiles of the water-soluble fraction of the cheese slices after different treatments expresses as area percent.

| SAMPLES               | Days of storage | 0-10 (min) | 10-40 (min) | 40-70 (min) | 70-100 (min) | HL    | HB    | HB/HL <sup>a</sup> |
|-----------------------|-----------------|------------|-------------|-------------|--------------|-------|-------|--------------------|
| CONTROL, batch A      | 0               | 38.32      | 29.20       | 8.89        | 23.58        | 34.82 | 26.86 | 0.77               |
|                       | 6               | 34.77      | 32.64       | 5.64        | 26.95        | 36.18 | 29.05 | 0.80               |
|                       | 17              | 34.47      | 34.33       | 6.14        | 24.90        | 38.05 | 27.31 | 0.72               |
|                       | 24              | 36.06      | 29.00       | 10.00       | 29.94        | 38.73 | 30.21 | 0.78               |
|                       | 40              | 39.49      | 34.80       | 6.18        | 19.41        | 39.30 | 21.09 | 0.54               |
| HPP, batch A          | 0               | 39.08      | 28.56       | 6.28        | 25.85        | 32.03 | 28.66 | 0.90               |
|                       | 6               | 36.22      | 38.14       | 7.07        | 18.90        | 39.10 | 25.00 | 0.64               |
|                       | 17              | 39.57      | 40.48       | 6.53        | 18.00        | 41.01 | 24.00 | 0.59               |
|                       | 24              | 37.84      | 26.53       | 10.69       | 24.94        | 34.00 | 28.16 | 0.83               |
|                       | 40              | 34.55      | 33.50       | 9.28        | 21.97        | 39.48 | 25.28 | 0.64               |
| LEF samples, batch A  | 6               | 34.37      | 30.84       | 4.94        | 29.84        | 31.91 | 33.71 | 1.06               |
|                       | 17              | 34.98      | 28.49       | 15.23       | 21.30        | 33.79 | 31.23 | 0.92               |
|                       | 24              | 34.52      | 31.49       | 14.76       | 19.23        | 37.26 | 28.22 | 0.76               |
|                       | 40              | 8.07       | 29.40       | 32.53       | 15.65        | 42.74 | 34.82 | 0.81               |
| HPP with LEF, batch A | 6               | 6.53       | 27.53       | 17.00       | 19.27        | 31.80 | 32.00 | 1.01               |
|                       | 17              | 10.13      | 32.99       | 30.00       | 24.51        | 47.50 | 40.00 | 0.84               |
|                       | 24              | 6.33       | 23.05       | 26.14       | 17.48        | 36.97 | 29.70 | 0.80               |
|                       | 40              | 6.34       | 21.91       | 31.11       | 11.71        | 34.68 | 30.04 | 0.87               |
| CONTROL, batch B      | 0               | 17.12      | 41.78       | 5.53        | 35.29        | 46.28 | 36.34 | 0.79               |
|                       | 5               | 23.01      | 43.22       | 9.97        | 23.59        | 49.70 | 27.08 | 0.54               |
|                       | 15              | 21.88      | 38.39       | 5.85        | 33.53        | 42.46 | 35.31 | 0.83               |
|                       | 27              | 22.85      | 35.89       | 16.80       | 21.36        | 41.30 | 32.75 | 0.79               |
|                       | 40              | 15.96      | 36.51       | 22.57       | 21.35        | 45.09 | 35.35 | 0.78               |
| HPP, batch B          | 0               | 24.45      | 46.88       | 14.92       | 23.58        | 51.24 | 34.14 | 0.67               |
|                       | 5               | 30.42      | 44.53       | 14.26       | 20.57        | 47.92 | 31.43 | 0.66               |
|                       | 15              | 19.46      | 47.03       | 14.93       | 28.44        | 50.71 | 39.68 | 0.78               |
|                       | 27              | 16.32      | 41.23       | 17.04       | 20.56        | 50.25 | 28.59 | 0.57               |
|                       | 40              | 11.92      | 40.13       | 24.19       | 19.36        | 51.46 | 32.21 | 0.63               |
| LEF samples, batch B  | 5               | 4.86       | 39.23       | 28.05       | 27.49        | 48.54 | 46.22 | 0.95               |
|                       | 15              | 7.52       | 40.15       | 30.99       | 21.30        | 50.35 | 42.09 | 0.84               |
|                       | 27              | 4.68       | 38.41       | 28.88       | 28.03        | 48.33 | 46.98 | 0.97               |
|                       | 40              | 7.33       | 39.08       | 30.82       | 22.69        | 50.33 | 42.25 | 0.84               |
| HPP with LEF, batch A | 5               | 6.82       | 36.85       | 27.57       | 15.79        | 46.93 | 33.28 | 0.71               |
|                       | 15              | 5.30       | 30.68       | 22.00       | 11.31        | 38.82 | 25.17 | 0.65               |
|                       | 27              | 6.40       | 30.58       | 21.54       | 15.92        | 38.62 | 29.42 | 0.76               |

|  |    |      |       |       |       |       |       |      |
|--|----|------|-------|-------|-------|-------|-------|------|
|  | 40 | 6.10 | 34.98 | 26.84 | 17.09 | 44.09 | 34.82 | 0.79 |
|--|----|------|-------|-------|-------|-------|-------|------|

<sup>a</sup>: Ratio of the area percent of the peaks eluted in these parts of the chromatograms

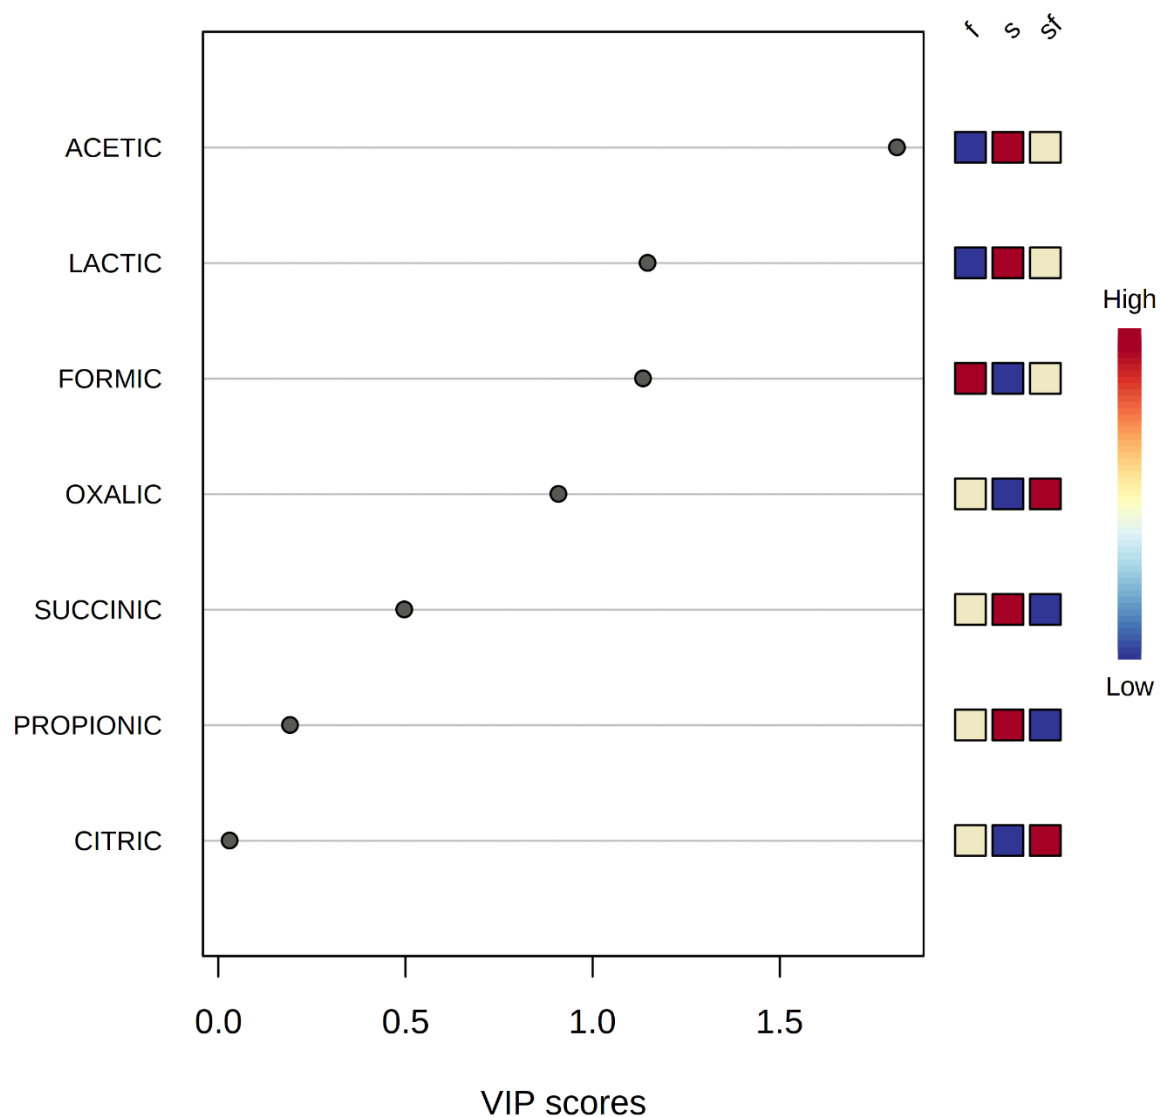

Supplementary Figure S1: Important features identified by partial least squares-discriminant analysis (PLS-DA) from cheese samples stored at 4 °C under the 3 sensory classes. The color scale on the right represents the scaled abundance of each variable, with red color boxes indicating high abundance and blue color boxes indicating low abundance.
